# Supplementary material
Source: publisher figshare collection journal article supplement (https://plos.figshare.com/articles/dataset/_/12013497)
Supplement: Supplementary file [file 1]

**Supplementary Table S2.** Confusion Matrices for the History-Oriented setting

| Feature-saving |         | Record-saving |          |
|----------------|---------|---------------|----------|
| 180 days       |         |               |          |
| 954<br>5       | 34<br>4 | 3736<br>32    | 45<br>20 |
| 360 days       |         |               |          |
| 941<br>6       | 23<br>4 | 3469<br>26    | 62<br>26 |
| 720 days       |         |               |          |
| 890<br>4       | 23<br>6 | 3160<br>17    | 47<br>35 |

All data were obtained using LSTM model
