# Supplementary material
Source: publisher figshare collection journal article supplement (https://plos.figshare.com/articles/dataset/_/12013497)
Supplement: Supplementary file [file 1]

**Supplementary Table S1.** Confusion Matrices for the Visit-Oriented setting

|          | Feature-saving |            | Record-saving |             |
|----------|----------------|------------|---------------|-------------|
| 180 days |                |            |               |             |
| SVM      | 3709<br>2      | 585<br>34  | 12834<br>31   | 1882<br>176 |
| RF       | 3708<br>0      | 586<br>36  | 12513<br>19   | 2203<br>188 |
| AB       | 3691<br>0      | 603<br>36  | 12558<br>23   | 2158<br>184 |
| KNN      | 3116<br>7      | 1178<br>29 | 12612<br>39   | 2104<br>168 |
| 360 days |                |            |               |             |
| SVM      | 3544<br>5      | 621<br>32  | 12160<br>40   | 1871<br>167 |
| RF       | 3636<br>4      | 529<br>33  | 11662<br>24   | 2370<br>183 |
| AB       | 3561<br>6      | 604<br>31  | 11719<br>24   | 2312<br>183 |
| KNN      | 2967<br>12     | 1198<br>25 | 11936<br>47   | 2095<br>160 |
| 720 days |                |            |               |             |
| SVM      | 3297<br>7      | 589<br>30  | 11404<br>47   | 1567<br>160 |
| RF       | 3353<br>8      | 533<br>29  | 11183<br>33   | 1788<br>174 |
| AB       | 3384<br>11     | 502<br>26  | 11032<br>32   | 1939<br>175 |
| KNN      | 2922<br>13     | 964<br>24  | 11072<br>50   | 1899<br>157 |

SVM: Support vector machines; RF: Random Forest; AB: Ada Boost; KNN: K nearest neighbours
